# Supplementary material for: Development of a liquid chromatography high resolution mass spectrometry method for the quantitation of viral envelope glycoprotein in Ebola virus-like particle vaccine preparations
Source: PubMed Central journal article supplement (PMC5011338; doi:10.1186/s12014-016-9119-8), 2016-09-05

# Supplemental Figure 2

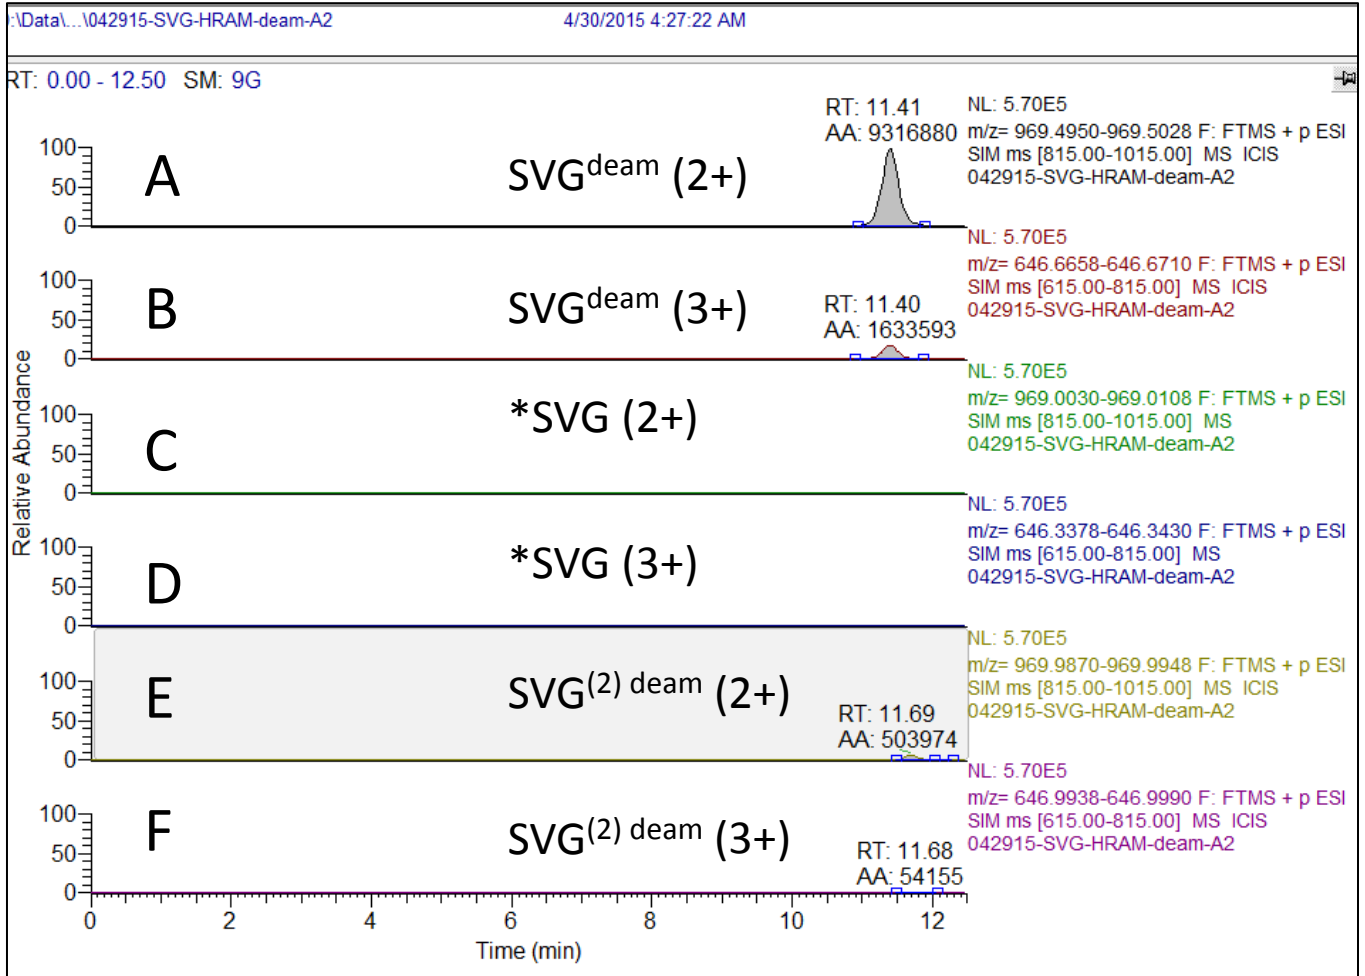

Supplement: 12014_2016_9119_MOESM3_ESM.pdf [file 12014_2016_9119_MOESM3_ESM.pdf]
